# Supplementary material for: A graphene oxide-based enzyme-free signal amplification platform for homogeneous DNA detection
Source: Royal Society of Chemistry journal article supplement (doi:10.1039/c4an00933a), 2014-07-01
Supplement: c4an00933a1.pdf [file c4an00933a1.pdf]

## Supplementary Information

### A Graphene Oxide-based Enzyme-Free Signal Amplification Platform for Homogeneous DNA Detection

Zhen Zhang, Yufei Liu, Xinghu Ji\*, Xia Xiang, and Zhike He\*

Key Laboratory of Analytical Chemistry for Biology and Medicine (Ministry of Education), College of Chemistry and Molecular Sciences, Wuhan University, Wuhan 430072, P. R. China. E-mail: zhkhe@whu.edu.cn; Fax: +86-27-6875-4067; Tel: +86-27-6875-6557

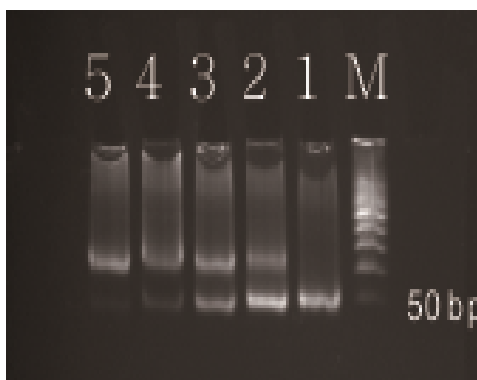

Figure S1 Nondenaturing polyacrylamide gel (20%) analysis of the formation of the H1–H2 complex: (1) H1; (2) H1 + H2; (3) H1 + H2 + 50 nM T; (4) H1 + H2 + 100 nM T; (5) H1 + H2 + 500 nM T.

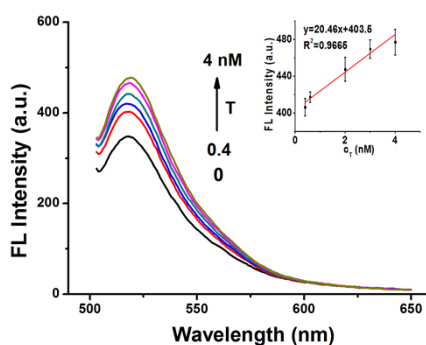

Figure S2 Fluorescence emission spectra in the presence of different amount of the target DNA in 1% serum. Concentration of target DNA: 0, 0.4, 0.6, 2, 3 and 4 nM (from the bottom to the top). Insert: the linear curve of target DNA detection in 1% serum. The data shown in the figures represent the average of three independent experiments ( $n=3$ ).
